# Supplementary material for: Degradation of 4-chlorophenol in a Fenton-like system using Au–Fe3O4magnetic nanocomposites as the heterogeneous catalyst at near neutral conditions
Source: Royal Society of Chemistry journal article supplement (doi:10.1039/c6ra10929b), 2016-01-01
Supplement: c6ra10929b1.pdf [file c6ra10929b1.pdf]

1

## Supplementary Materials

2 **Degradation of 4-Chlorophenol in Fenton-like system using Au-Fe<sub>3</sub>O<sub>4</sub>**

3 **magnetic nanocomposites as the heterogeneous catalyst at near**

4 **neutral condition**

5

6 **Jie Liu<sup>a</sup>, Zhiwei Zhao<sup>a, \*</sup>, Zhaoxia Ding<sup>a</sup>, Zhendong Fang<sup>a, \*</sup>, Fuyi Cui<sup>b</sup>**

7 a Department of National Defense Architecture Planning and Environmental

8 Engineering, Logistical Engineering University, Chongqing 401311, China

9 b State Key Laboratory of Urban Water Resource and Environment and School of

10 Municipal and Environmental Engineering, Harbin Institute of Technology, Harbin

11 150090, China

12

13

Table S1. Physical character of the prepared three samples

|          | Saturation<br>magnetization<br>(emu g <sup>-1</sup> ) | Coercivity<br>(Oe) | BET surface<br>(m <sup>2</sup> /g) | Average diameter<br>of pore<br>(nm) |
|----------|-------------------------------------------------------|--------------------|------------------------------------|-------------------------------------|
| Sample 1 | 82.25                                                 | 90.02              | 43.79                              | 0.25                                |
| Sample 2 | 82.92                                                 | 72.46              | 42.69                              | 0.22                                |
| Sample 3 | 83.38                                                 | 86.53              | 44.27                              | 0.27                                |

14

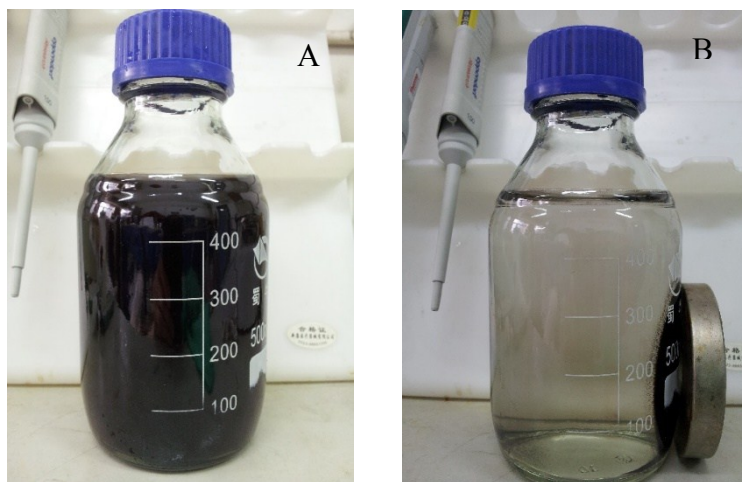

1

2 **Fig. S1** The synthesized catalysts dispersed in water for 5 min (A) and then with magnet  
3 by side for 2 min (B).

4

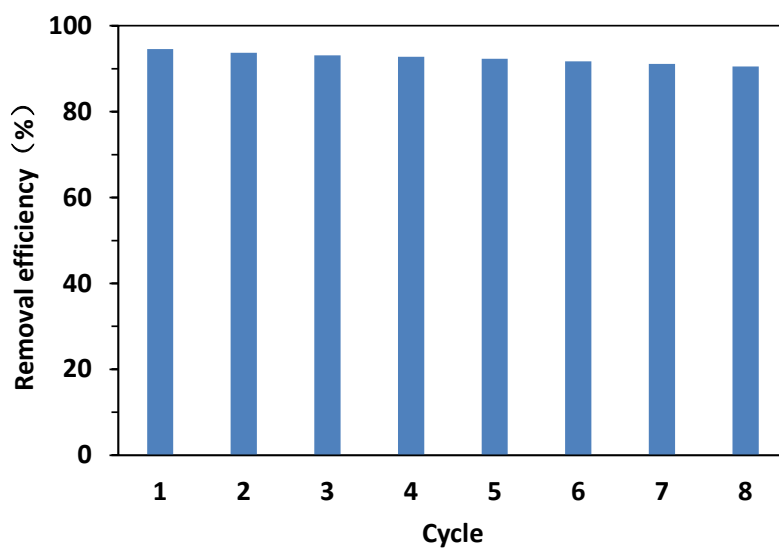

5

6 **Fig. S2** Stability of the Au-Fe<sub>3</sub>O<sub>4</sub> nanocomposites in the repeated batch 4-CP  
7 degradation experiment. Reaction conditions: initial pH 5.0, catalyst dose 0.1 g/L, H<sub>2</sub>O<sub>2</sub>  
8 dose 0.5 g/L, initial concentration of 4-CP 25 mg/L, temperature 303 K, reaction time  
9 4 h.

10

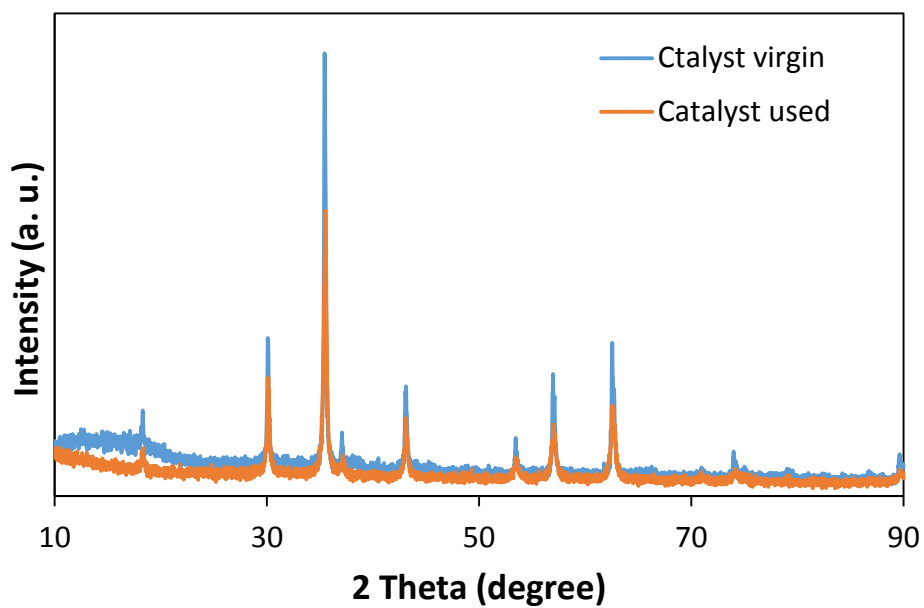

1

2 **Fig. S3** XRD spectrum of catalyst.

3

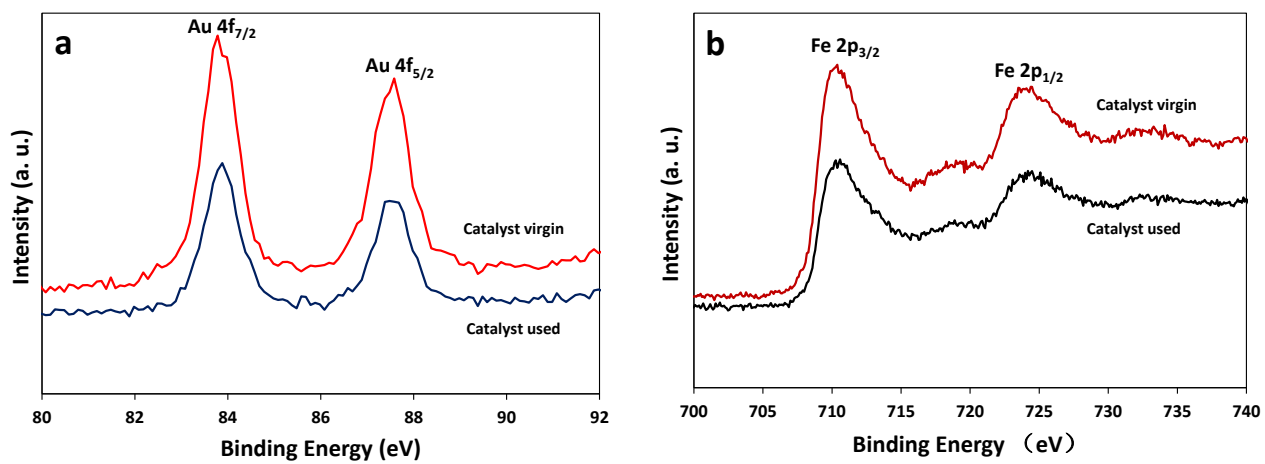

4

5 **Fig. S4** (a) The Au 4f and (b) Fe 2p XPS spectrum of catalyst.

6

7

8

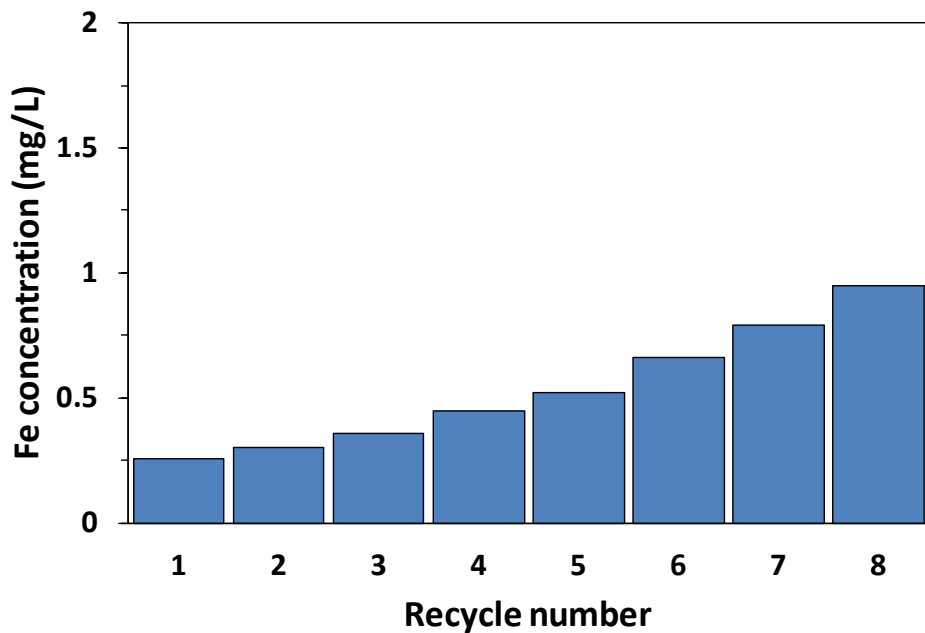

1

2 **Fig. S5** Fe ion leaching in the repeated batch 4-CP degradation experiment. Reaction  
 3 conditions: initial pH 5.0, catalyst dose 0.1 g/L, H<sub>2</sub>O<sub>2</sub> dose 0.5 g/L, initial concentration  
 4 of 4-CP 25 mg/L, temperature 303 K, reaction time 4 h.

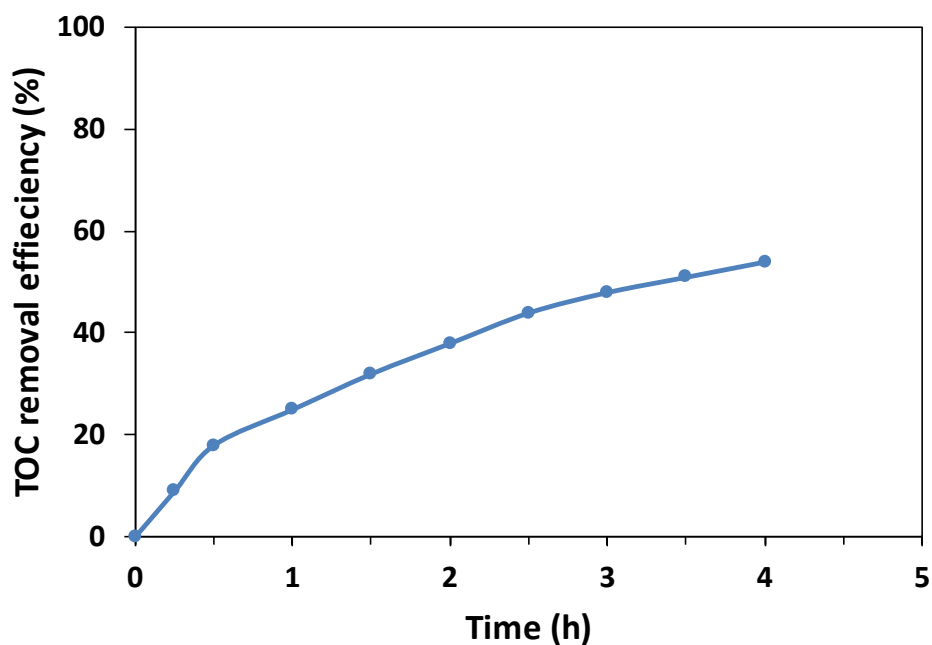

5

6 **Fig. S6** TOC removal in the 4-CP degradation experiment. Reaction conditions: initial  
 7 pH 5.0, catalyst dose 0.1 g/L, H<sub>2</sub>O<sub>2</sub> dose 0.5 g/L, initial concentration of 4-CP 25 mg/L,

1 temperature 303 K, reaction time 4 h.
